# Supplementary material for: Lipid droplets sequester palmitic acid to disrupt endothelial ciliation and exacerbate atherosclerosis in male mice
Source: PubMed Central journal article supplement — Nat Commun. 2024 Sep 27;15:8273. doi: 10.1038/s41467-024-52621-x (PMC11437155; doi:10.1038/s41467-024-52621-x), 2024-09-27

## Supplementary Information

### **Lipid Droplets Sequester Palmitic Acid to Disrupt Endothelial Ciliation and Exacerbate Atherosclerosis in Male Mice**

Yanjie Tan<sup>1,8</sup>, Zhenzhou Huang<sup>1,8</sup>, Yi Jin<sup>2</sup>, Jiaying Wang<sup>1</sup>, Hongjun Fan<sup>1</sup>, Yangyang Liu<sup>1</sup>, Liang Zhang<sup>2</sup>, Yue Wu<sup>1</sup>, Peiwei Liu<sup>1</sup>, Tianliang Li<sup>1</sup>, Jie Ran<sup>1</sup>, He Tian<sup>3</sup>, Sin Man Lam<sup>3,4</sup>, Min Liu<sup>5</sup>, Jun Zhou<sup>1,6\*</sup>, Yunfan Yang<sup>7\*</sup>

<sup>1</sup>Center for Cell Structure and Function, Haihe Laboratory of Cell Ecosystem, Collaborative Innovation Center of Cell Biology in Universities of Shandong, Shandong Provincial Key Laboratory of Animal Resistance Biology, College of Life Sciences, Shandong Normal University, Jinan 250014, China.

<sup>2</sup>Metabolism and Disease Research Centre, Central Hospital Affiliated to Shandong First Medical University, Jinan 250013, China.

<sup>3</sup>State Key Laboratory of Molecular Developmental Biology, Institute of Genetics and Developmental Biology, Chinese Academy of Sciences, Beijing 100101, China.

<sup>4</sup>LipidALL Technologies Company Limited, Changzhou 213022, China.

<sup>5</sup>Laboratory of Tissue Homeostasis, Haihe Laboratory of Cell Ecosystem, Tianjin 300462, China.

<sup>6</sup>State Key Laboratory of Medicinal Chemical Biology, College of Life Sciences, Nankai University, Tianjin 300071, China.

<sup>7</sup>Department of Cell Biology, School of Basic Medical Sciences, Cheeloo College of Medicine, Shandong University, Jinan 250012, China.

<sup>8</sup>These authors contributed equally to this work.

\*Correspondence: junzhou@sdu.edu.cn (J.Z.); yunfanyang@sdu.edu.cn (Y.Y.)

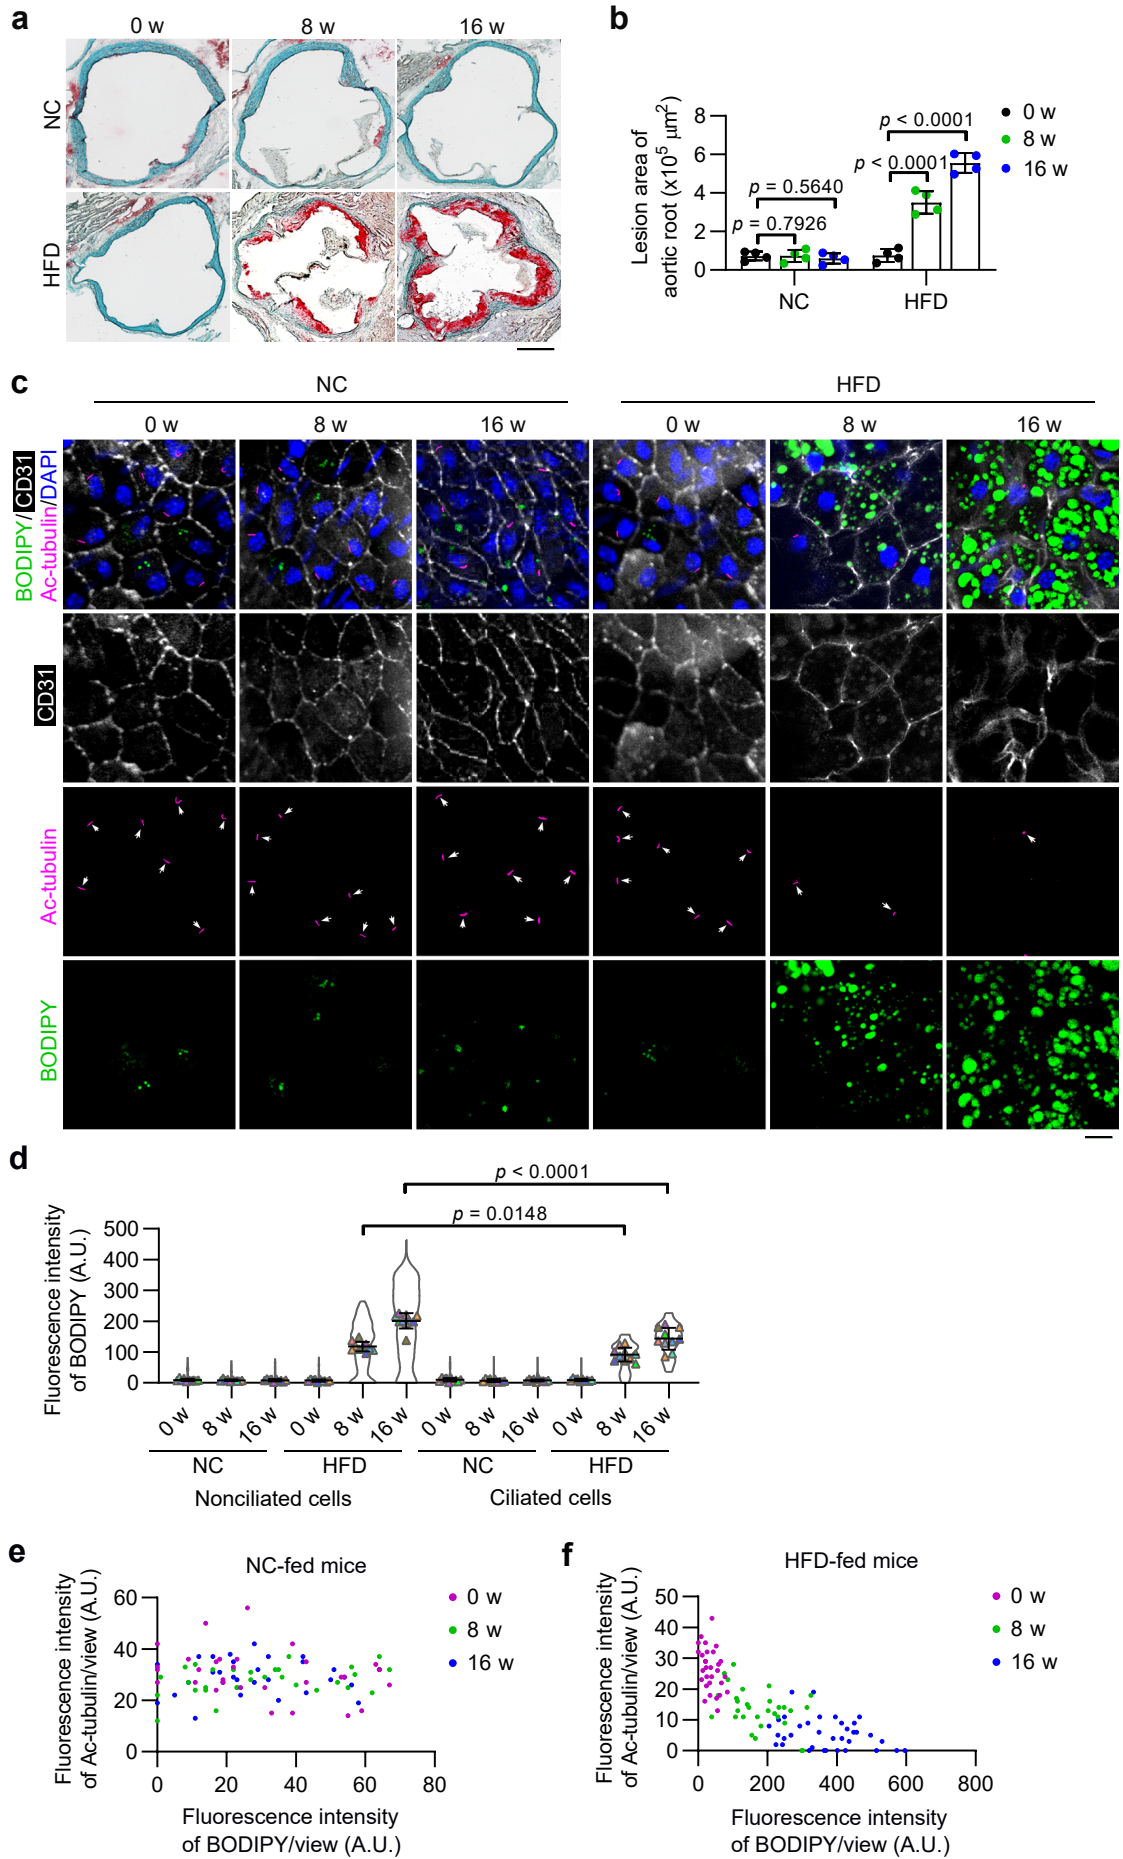

**Supplementary Figure 1.** HFD feeding induces atherosclerosis in mice. **a** Representative Oil Red O (ORO) staining of aortic root sections from ApoE<sup>KO</sup> mice fed normal chow (NC) or high fat diet (HFD) for indicated periods. Scale bar, 200  $\mu$ m. **b** Quantitative analysis of panel **a** (n = 4 mice). **c** *En face* immunofluorescence images of aortic arch VECs stained with antibodies against cluster of differentiation 31 (CD31, white) and ac-tubulin (magenta). LDs were stained with BODIPY (green), and nuclei were stained with DAPI (blue). Scale bar, 10  $\mu$ m. **d** Quantification of the fluorescence intensity of BODIPY in non-ciliated and ciliated VECs of the aortic arch shown in Fig. 1c (n = 10 mice). **e, f** Scatter plots showing the relationship between ciliary signal and LD signal of randomly chosen locations in the inner curvature of the aortic arch (n = 10 mice). Data are presented as mean  $\pm$  SEM. Statistical significance was determined by unpaired two-tailed Student's t-test (**d**) or one-way ANOVA with post hoc analysis (**b**). Source data are provided as a Source Data file.

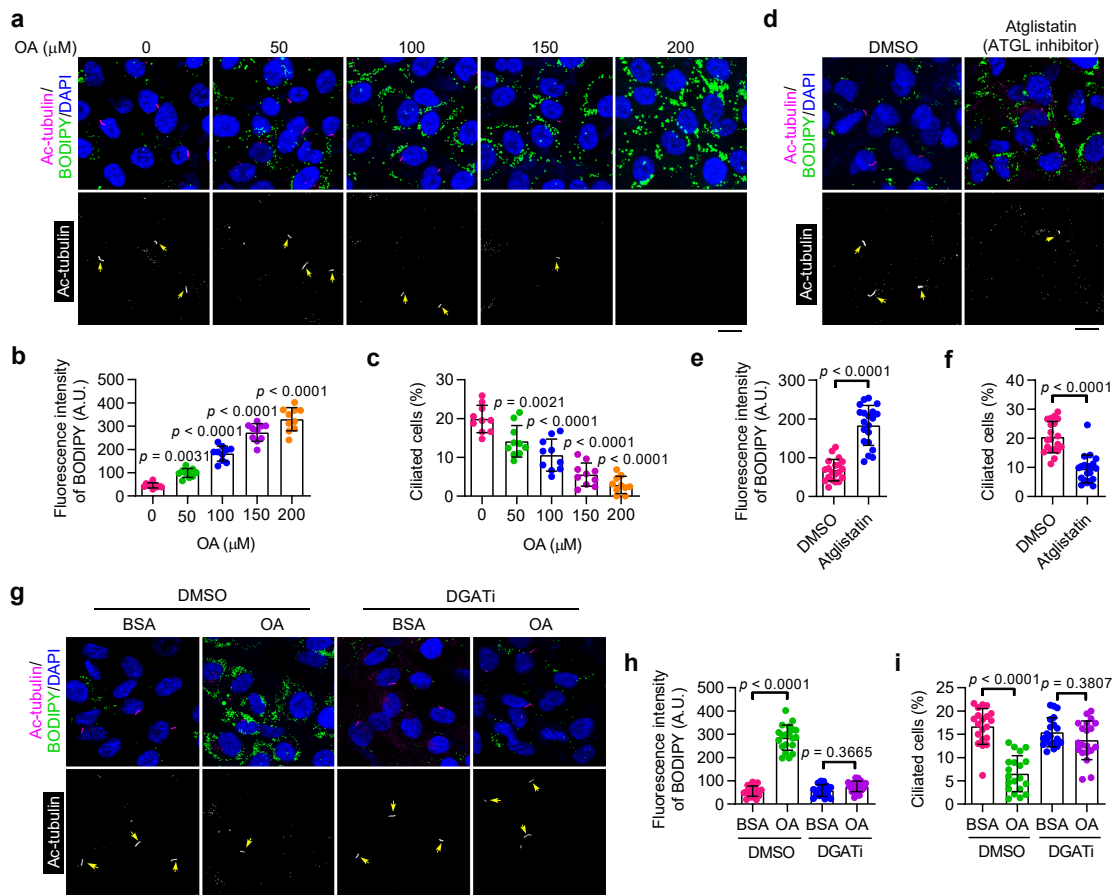

**Supplementary Figure 2.** Accumulation of LDs triggers ciliary loss in cultured VECs. **a-c** Immunofluorescence images (**a**) and quantifications of BODIPY staining (**b**) and ciliation (**c**) of cultured HUVECs treated with oleic acid (OA) at the indicated concentration for 12 h, followed by serum starvation for 48 h ( $n = 10$  fields from 3 independent experiments). Scale bar, 10  $\mu$ m. **d-f** Immunofluorescence images (**d**) and quantifications of BODIPY staining (**e**) and ciliation (**f**) of HUVECs treated with Atglistatin (10  $\mu$ M) for 12 h, followed by serum starvation for 48 h ( $n = 20$  fields from 3 independent experiments). Scale bar, 10  $\mu$ m. **g-i** Immunofluorescence images (**g**) and quantifications of BODIPY staining (**h**) and ciliation (**i**) of HUVECs treated with DMSO or DGAT inhibitors (A922500, 10  $\mu$ M and PF-06424439, 5  $\mu$ M) for 24 h, exposed to BSA or OA (200  $\mu$ M) for 12 h, and then serum-starved for 48 h ( $n = 20$  fields from 3 independent experiments). BSA was used as a control treatment. Scale bar, 10  $\mu$ m. Data are presented as mean  $\pm$  SEM. Statistical significance was determined by unpaired two-tailed Student's t-test (**e**, **f**), one-way (**b**, **c**), or two-way (**h**, **i**) ANOVA with post hoc analysis. Source data are provided as a Source Data file.

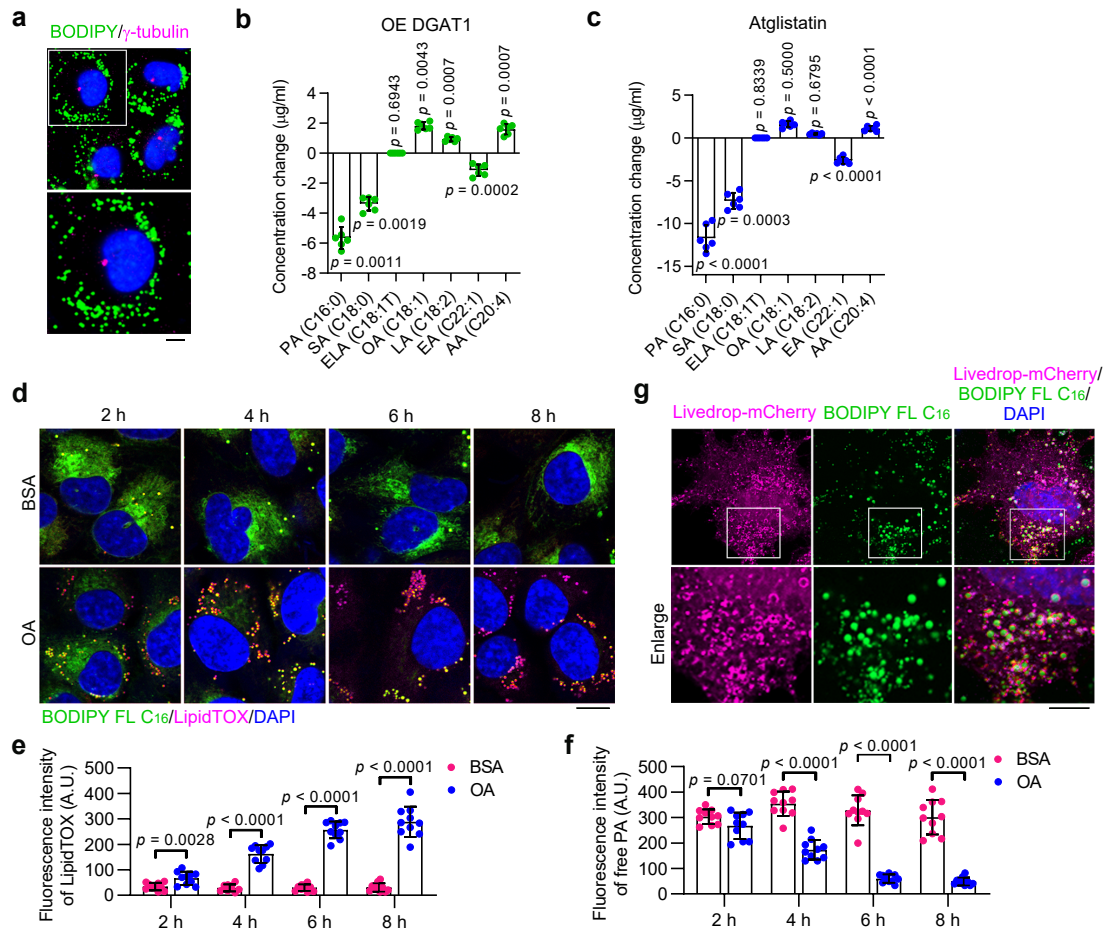

**Supplementary Figure 3.** LD accumulation in endothelial cells preferentially stimulates the sequestration of cytosolic PA. **a** Immunofluorescence images of HUVECs labeled with  $\gamma$ -tubulin antibody (magenta) and stained with BODIPY (green) and DAPI (blue). Boxed area is enlarged in the bottom panel. Scale bar (for enlarged image), 5  $\mu$ m. **b, c** GC-MS analysis showing changes in levels of indicated free fatty acids in HUVECs exposed to DGAT1 overexpression for 48 h (**b**) or Atglistatin (10  $\mu$ M) treatment for 24 h (**c**). PA: palmitic acid, SA: stearic acid, ELA: elaidic acid, OA: oleic acid, LA: linoleic acid, EA: erucic acid, AA: arachidonic acid. **d-f** HUVECs were pre-incubated with BODIPY FL C16 (0.5  $\mu$ M) for 30 min and then treated with oleic acid (OA, 200  $\mu$ M) or BSA for indicate periods (**d**). The fluorescence intensity of LipidTOX (**e**) and cytosolic PA (**f**) were quantified (n = 10 fields from 3 independent experiments). Scale bar, 10  $\mu$ m. **g** HUVECs expressing livedrop-mCherry were pre-incubated with BODIPY FL C16 (0.5  $\mu$ M) for 30 min and then treated with OA (200  $\mu$ M) for 30 min. Boxed areas are enlarged in the bottom panel. Scale bar (for enlarged images), 5  $\mu$ m.

Data are presented as mean  $\pm$  SEM. Statistical significance was determined by unpaired two-tailed Student's t-test. Source data are provided as a Source Data file.

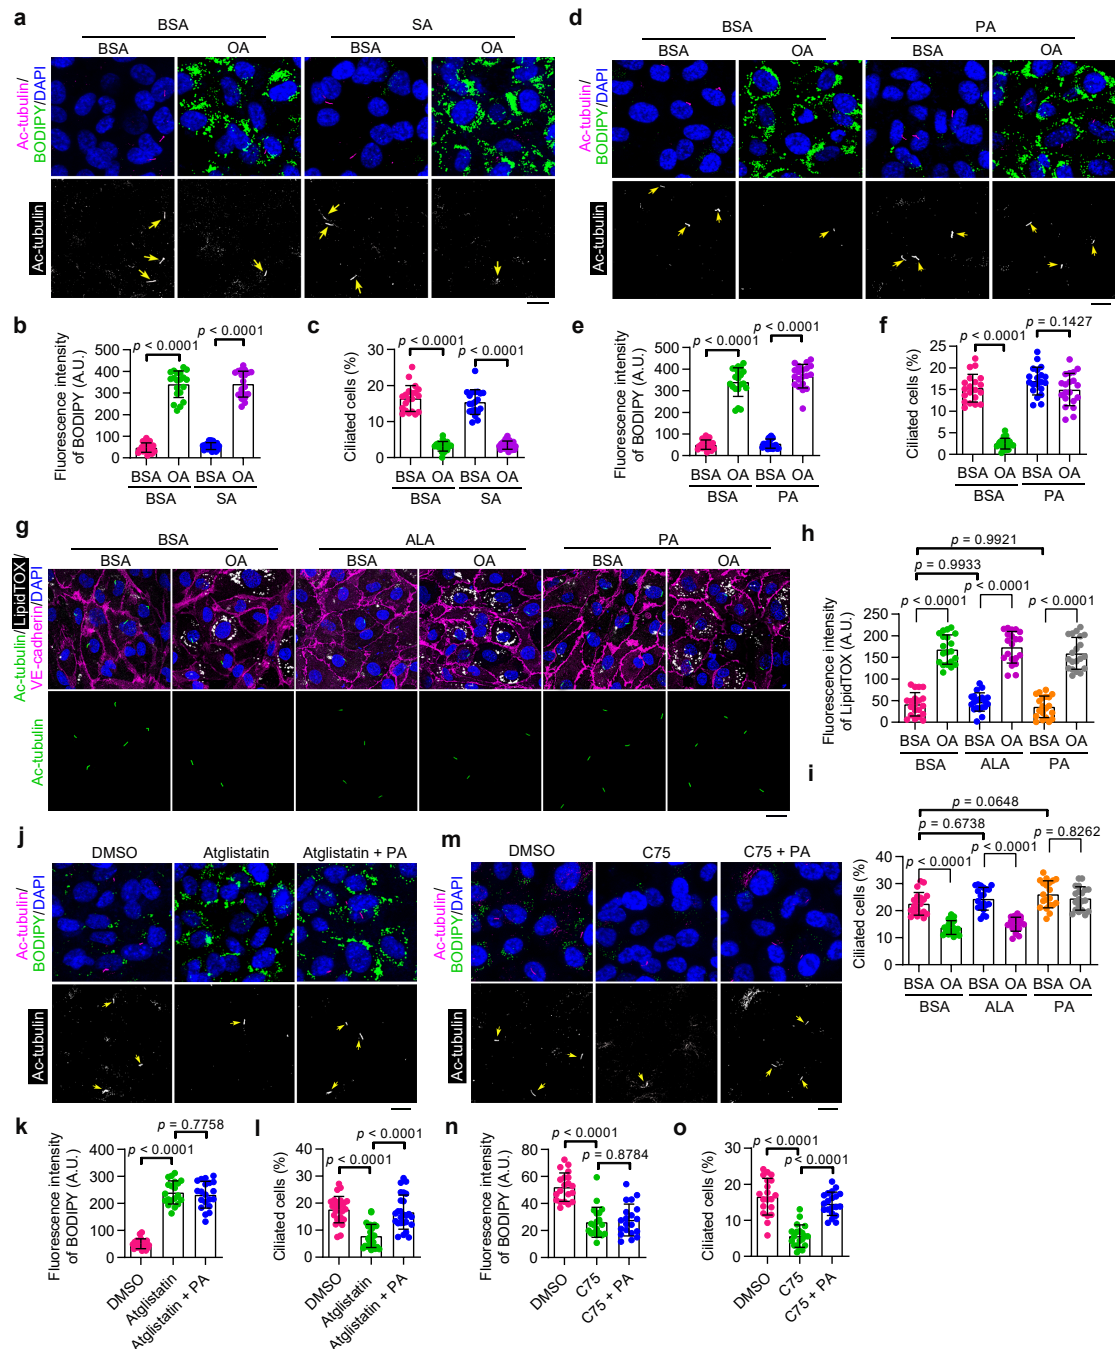

**Supplementary Figure 4.** LD accumulation disrupts ciliary homeostasis by reducing cytosolic PA. **a-f** Immunofluorescence images (**a, d**) and quantifications of BODIPY staining (**b, e**) and ciliation (**c, f**) of HUVECs first treated with BSA or oleic acid (OA, 200  $\mu$ M) for 12 h, then supplemented with stearic acid (SA, 200  $\mu$ M) or palmitic acid (PA, 200  $\mu$ M) for 12 h, and finally serum-starved for 48 h ( $n = 20$  fields from 3 independent experiments). Scale bars, 10  $\mu$ m. **g-i** Immunofluorescence images (**g**) and quantifications of LipidTOX staining (**h**) and ciliation (**i**) of HAECs serum-starved for

48 h, then exposed to OA (100  $\mu$ M) and/or  $\alpha$ -linolenic acid (ALA) or PA (100  $\mu$ M) for 16 h (n = 20 fields from 3 independent experiments). Scale bar, 20  $\mu$ m. **j-l** Immunofluorescence images (**j**) and quantifications of BODIPY staining (**k**) and ciliation (**l**) of HUVECs treated with Atglistatin (10  $\mu$ M) for 12 h, exposed to PA (200  $\mu$ M) for 12 h, and then serum-starved for 48 h (n = 20 fields from 3 independent experiments). Scale bar, 10  $\mu$ m. **m-o** Immunofluorescence images (**m**) and quantifications of BODIPY staining (**n**) and ciliation (**o**) of HUVECs treated with an FASN inhibitor (C75, 10  $\mu$ M) for 24 h, exposed to PA (200  $\mu$ M) for 12 h, and then serum-starved for 48 h (n = 20 fields from 3 independent experiments). Scale bar, 10  $\mu$ m. Data are presented as mean  $\pm$  SEM. Statistical significance was determined by one-way (**k, l, n, o**), or two-way (**b, c, e, f, h, i**) ANOVA with post hoc analysis. Source data are provided as a Source Data file.



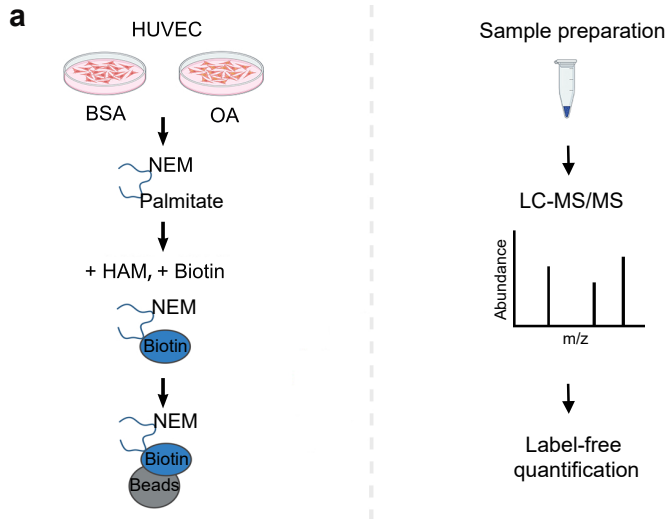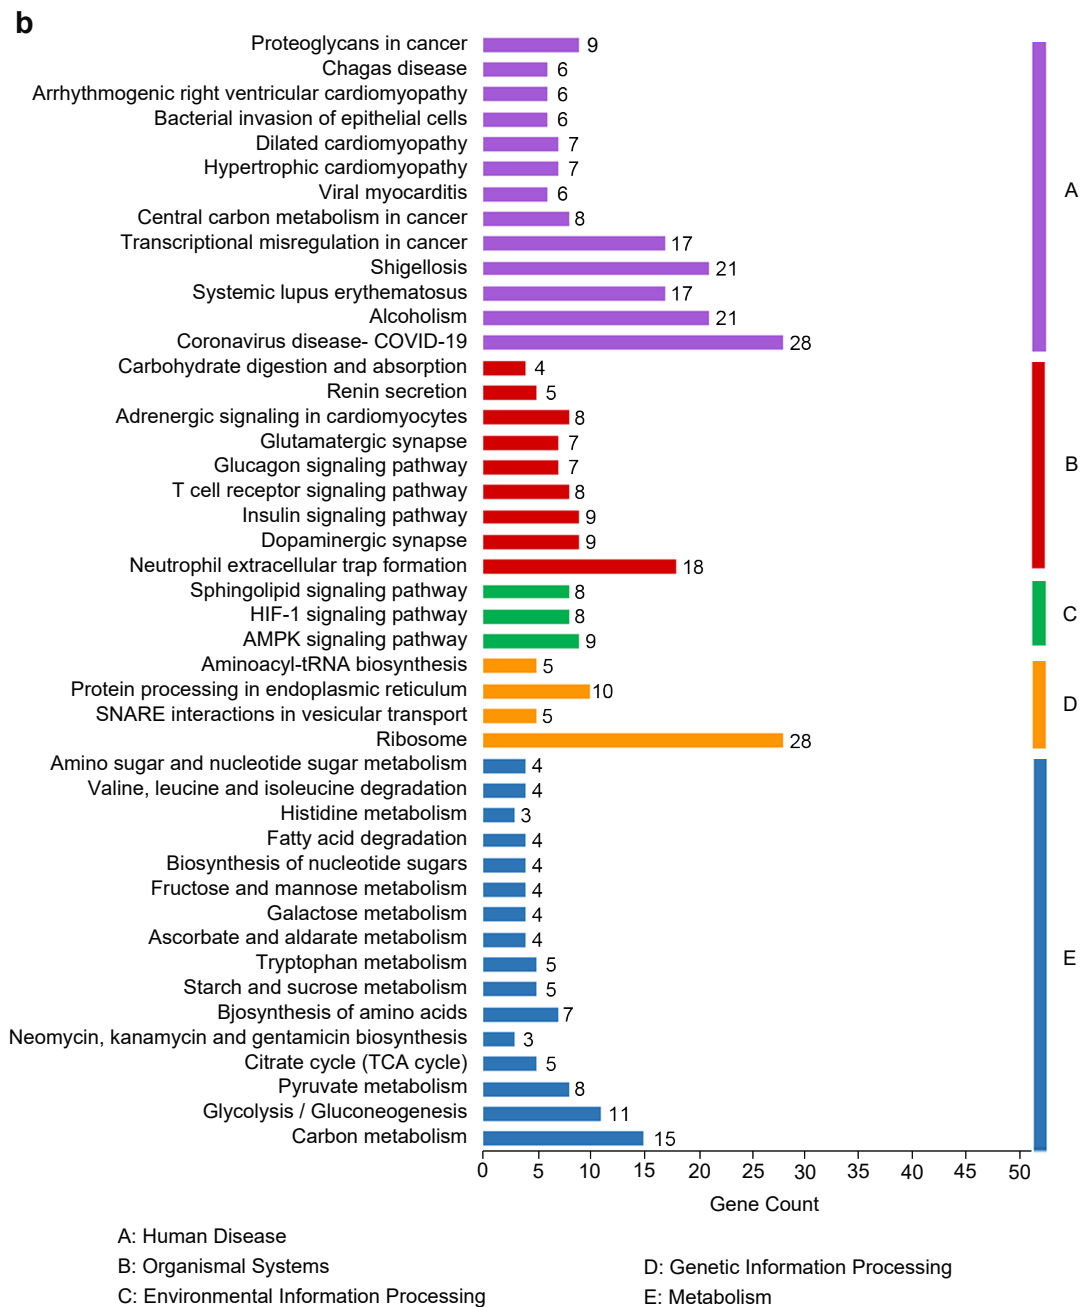

**Supplementary Figure 5.** ABE-MS detection of S-palmitoylated proteins. **a** Schematic describing the enrichment strategy and mass spectrometry-based workflow used for the identification of S-acylated proteins in HUVECs treated with BSA or oleic acid (OA, 200  $\mu$ M) for 12 h. NEM, N-Ethylmaleimide; HAM, hydroxylamine. **b** KEGG analysis of differentially S-palmitoylated proteins between BSA- and OA-treated HUVECs. Panel **a** was created with BioRender.com released under a Creative Commons Attribution-NonCommercial-NoDerivs 4.0 International license.

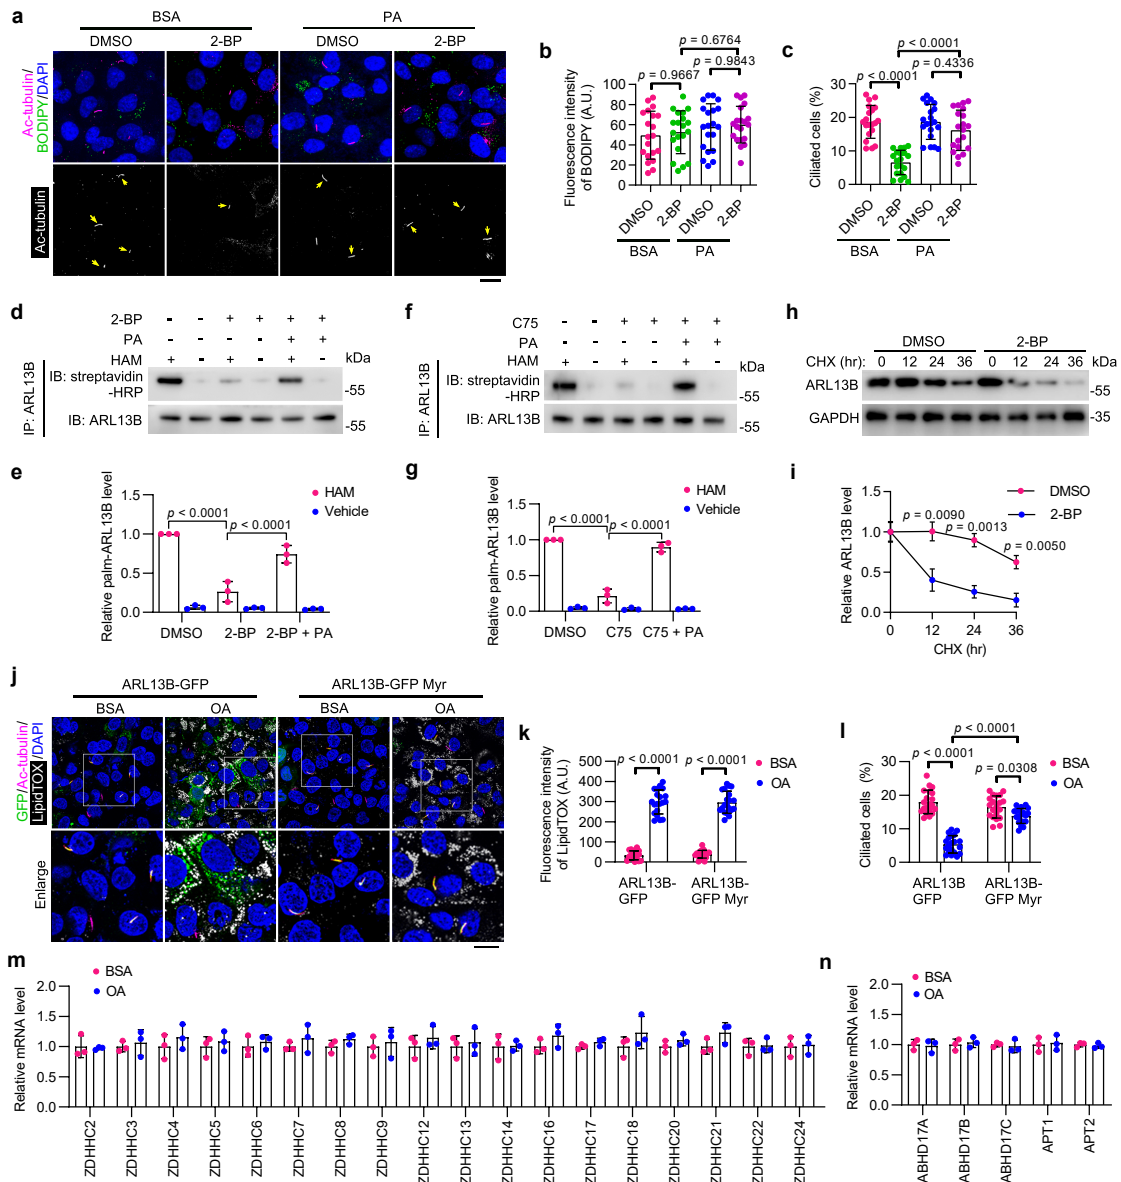

**Supplementary Figure 6.** PA is essential for ARL13B S-palmitoylation. **a-c** Immunofluorescence images (**a**) and quantifications of BODIPY staining (**b**) and ciliation (**c**,  $n = 20$  fields from 3 independent experiments) of HUVECs first treated with DMSO or 2-Bromopalmitate (2-BP, 50  $\mu$ M) for 24 h, exposed to BSA or palmitic acid (PA, 200  $\mu$ M) for 12 h, and then serum-starved for 48 h. Scale bar, 10  $\mu$ m. **d, e** MAECs were first treated with DMSO or 2-BP (50  $\mu$ M) for 24 h and then supplemented with either BSA or PA (200  $\mu$ M) for another 12 h. The level of ARL13B S-palmitoylation was examined by IP-ABE and immunoblotting (**d**) and quantified by densitometry (**e**) ( $n = 3$  samples). HAM, hydroxylamine. **f, g** MAECs were pre-treated with DMSO or the FASN inhibitor C75 (10  $\mu$ M) for 24 h and then supplemented with

either BSA or PA (200  $\mu$ M) for another 12 h. The level of ARL13B S-palmitoylation was then examined by IP-ABE and immunoblotting (**f**) and quantified by densitometry (**g**) (n = 3 samples). **h, i** HUVECs were treated with DMSO or 2-BP (50  $\mu$ M) for 24 h and then treated with CHX (20 mg/mL) for indicated periods. The level of ARL13B was examined by immunoblotting (**h**) and quantified by densitometry (**i**) (n = 3 samples). **j-l** Immunofluorescence images (**j**) and quantifications of LipidTOX staining (**k**) and ciliation (**l**) of HAECs overexpressed with ARL13B-GFP or ARL13B-GFP Myr and treated with BSA or oleic acid (OA, 200  $\mu$ M) (n = 20 fields from 3 independent experiments). Boxed areas are enlarged in the bottom panel. Scale bar (for enlarged images), 10  $\mu$ m. **m, n** Transcriptional levels of palmitoyl acyltransferases (ZDHHCs) (**m**) and depalmitoylases, including APT1, APT2, ABHD17A, ABHD17B, and ABHD17C (**n**) in MAECs treated with BSA or OA (200  $\mu$ M) for 12 h (n = 3 samples). Data are presented as mean  $\pm$  SEM. Statistical significance was determined by unpaired two-tailed Student's t-test (**i, m, n**) or two-way ANOVA with post hoc analysis (**b, c, e, g, k, l**). Source data are provided as a Source Data file.

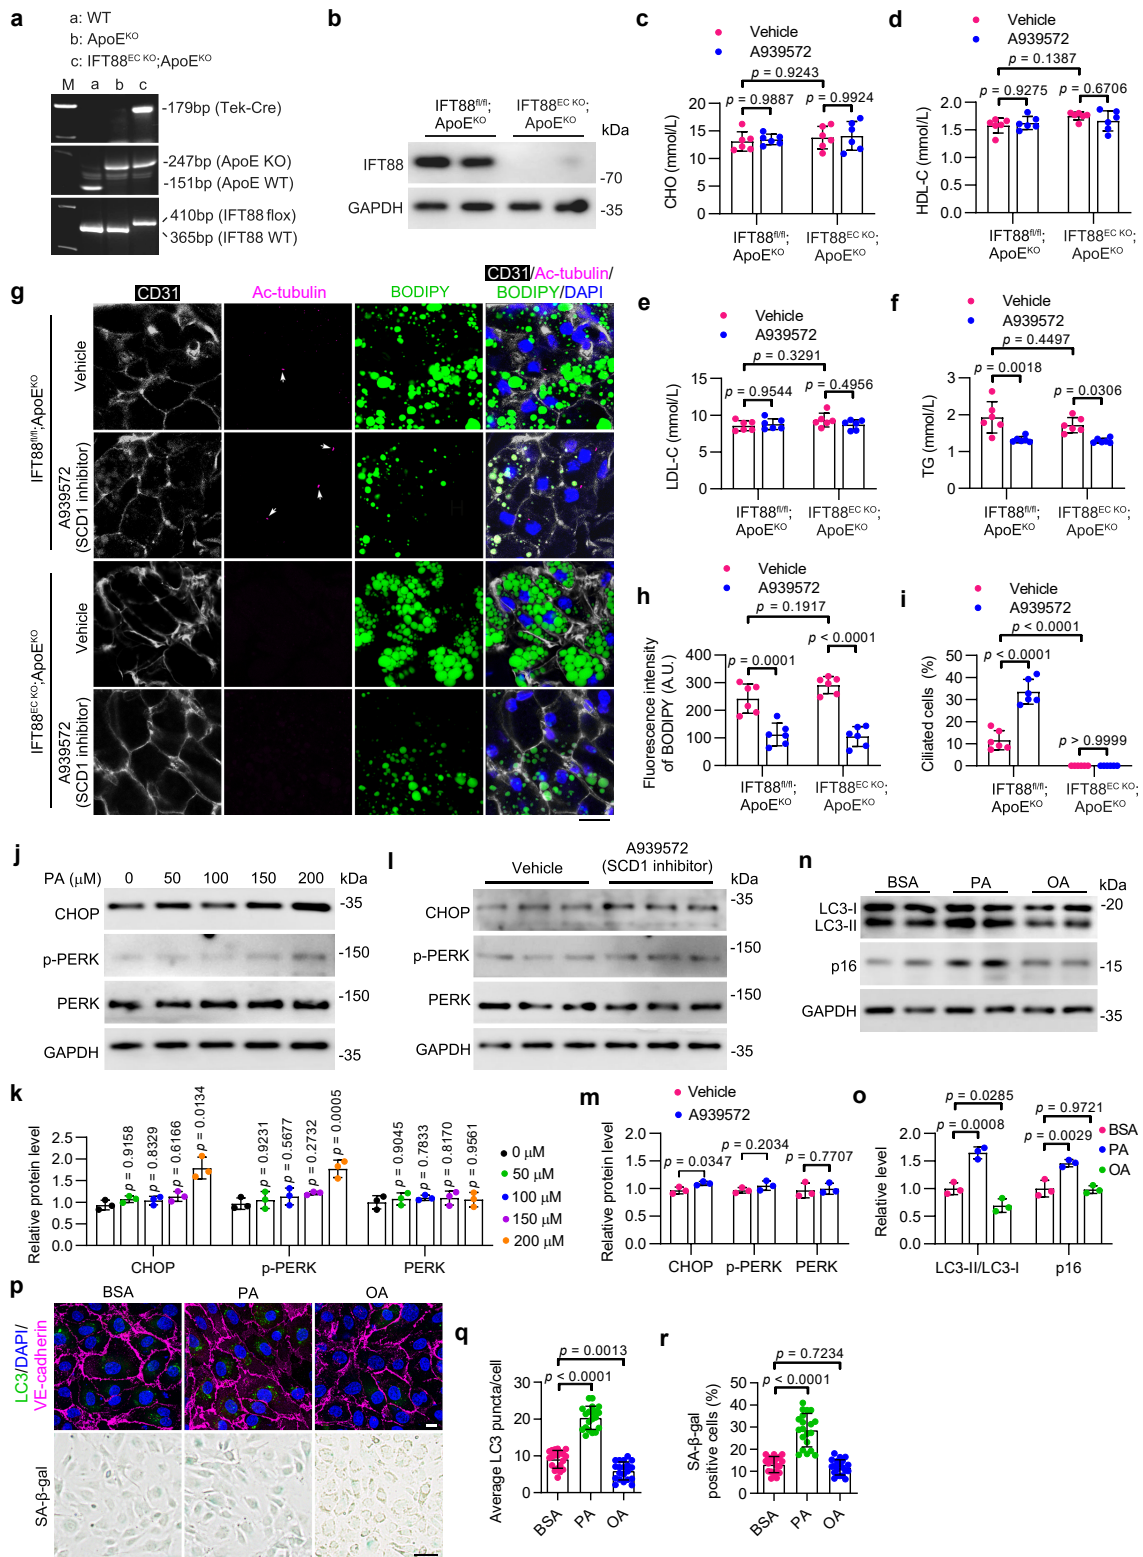

**Supplementary Figure 7. Effects of SCD1 inhibition on circulating lipid levels. a** Genotyping of indicated mouse lines. M: marker, a: WT, b: ApoE<sup>KO</sup>, c: IFT88<sup>EC</sup>KO; ApoE<sup>KO</sup>. **b** Immunoblotting of IFT88 protein level in MAECs isolated from IFT88<sup>EC</sup>KO; ApoE<sup>KO</sup> and littermate ApoE<sup>KO</sup> mice. **c-f** Levels of total cholesterol (CHO, **c**), high-density lipoprotein cholesterol (HDL-C, **d**), low-density lipoprotein cholesterol (LDL-C, **e**), and triglyceride (TG, **f**) in IFT88<sup>EC</sup>KO; ApoE<sup>KO</sup> mice treated with Vehicle or A939572 (SCD1 inhibitor). **g** Fluorescence microscopy images of MAECs stained for CD31, Ac-tubulin, BODIPY, and BODIPY/DAPI. **h** Fluorescence intensity of BODIPY in MAECs. **i** Percentage of ciliated cells in MAECs. **j** Western blot analysis of CHOP, p-PERK, PERK, and GAPDH in MAECs treated with increasing concentrations of PA. **k** Relative protein levels of CHOP, p-PERK, and PERK in MAECs. **l** Western blot analysis of CHOP, p-PERK, PERK, and GAPDH in MAECs treated with Vehicle or A939572 (SCD1 inhibitor). **m** Relative protein levels of CHOP, p-PERK, and PERK in MAECs. **n** Western blot analysis of LC3-I, LC3-II, p16, and GAPDH in MAECs treated with BSA, PA, or OA. **o** Relative levels of LC3-II/LC3-I and p16 in MAECs. **p** Fluorescence microscopy images of MAECs stained for LC3/DAPI and VE-cadherin, and SA-β-gal staining. **q** Average LC3 puncta per cell in MAECs. **r** Percentage of SA-β-gal positive cells in MAECs.

C, e), and triglycerides (TG, f) in the serum of IFT88<sup>EC KO</sup>;ApoE<sup>KO</sup> and littermate ApoE<sup>KO</sup> mice intravenously injected with A939572 (5 mg/kg body weight/2 days) or vehicle for 4 weeks (n = 6 mice). g-i, *En face* immunofluorescence images (g) and quantifications of BODIPY staining (h) and ciliation (i) of aortic arch VECs of IFT88<sup>EC KO</sup>;ApoE<sup>KO</sup> and littermate ApoE<sup>KO</sup> mice intravenously injected with A939572 (5 mg/kg body weight/2 days) or vehicle for 4 weeks after an 8-week HFD feeding (n = 6 mice). Scale bar, 20  $\mu$ m. j, k Immunoblotting (j) and quantification (k) of the protein levels of CHOP in MAECs treated with PA at the indicated concentration for 12 h (n = 3 samples). l, m Immunoblotting (l) and quantification (m) of the protein levels of CHOP, p-PERK, and PERK in the aortic arch of ApoE<sup>KO</sup> mice intravenously injected with A939572 (5 mg/kg body weight/2 days) or vehicle for 4 weeks after an 8-week HFD feeding (n = 3 mice). n, o Immunoblotting (n) and quantification (o) of LC3 lipidation and p16 protein level in HAECs (n = 3 samples). p-r Images (p) and quantifications of LC3 puncta (q) and SA- $\beta$ -gal-positive cells (r) in HAECs treated with OA or PA (200  $\mu$ M) for 12 h (n = 20 fields from 3 independent experiments). Scale bar for immunofluorescence images, 20  $\mu$ m. Scale bar for SA- $\beta$ -gal staining, 50  $\mu$ m. Data are presented as mean  $\pm$  SEM. Statistical significance was determined by unpaired two-tailed Student's t-test (m), one-way (k, o, q, r), or two-way (c, d-f, h, i) ANOVA with post hoc analysis. Source data are provided as a Source Data file.

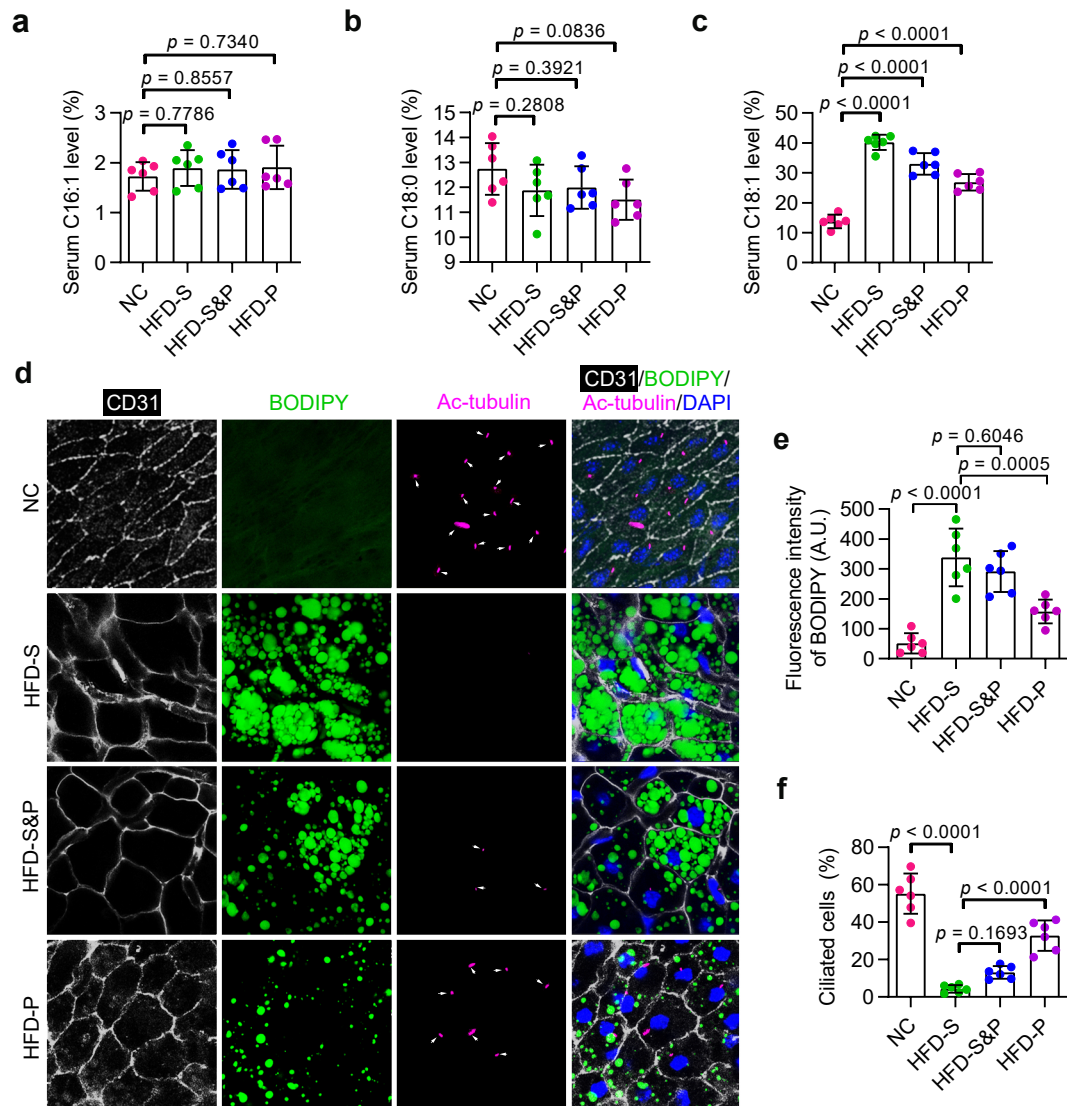

**Supplementary Figure 8.** Examination of ApoE<sup>KO</sup> mice challenged with the indicated diets. **a-c** Levels of palmitoleic acid (POA, C16:1) (**a**), stearic acid (SA, C18:0) (**b**), and oleic acid (OA, C18:1) (**c**) in the serum of ApoE<sup>KO</sup> mice fed with the indicated diets (n = 6 mice). **d-f** *En face* immunofluorescence images (**d**) and quantifications of BODIPY staining (**e**) and ciliation (**f**) of aortic arch VECs of ApoE<sup>KO</sup> mice treated as described in Fig. 7a (n = 6 mice). NC, normal chow; HFD, high fat diet; S, soybean oil; P, palm oil. Scale bar, 10  $\mu$ m. Data are presented as mean  $\pm$  SEM. Statistical significance was determined by one-way ANOVA with post hoc analysis. Source data are provided as a Source Data file.

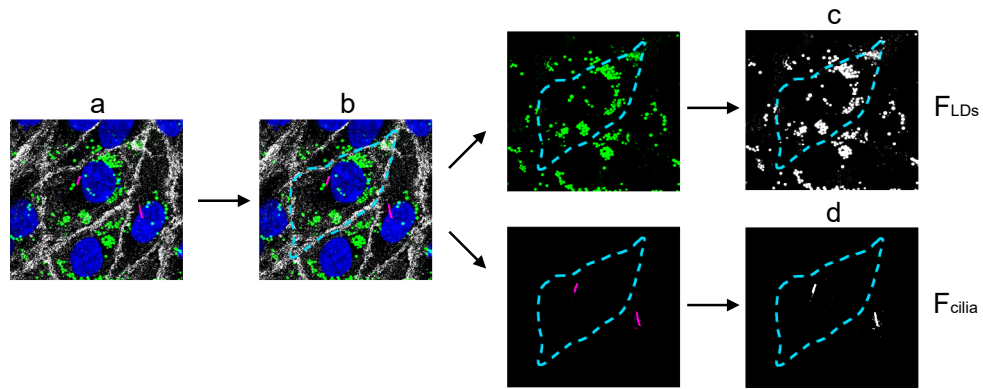

**Supplementary Figure 9.** Scheme depicting the method for measuring the fluorescence intensity of LDs and cilia in individual endothelial cells. **a** VE-cadherin immunofluorescence staining was performed to label the cell membrane of endothelial cells for delineating each cell's region. **b** Individual cell regions were outlined with cyan dashed lines based on the VE-cadherin fluorescence signal using ImageJ software. **c, d** The fluorescence intensities in the indicated channels within the selected regions were measured as  $F_{LDs}$  (**c**) and  $F_{cilia}$  (**d**) using the "measurement" tool by ImageJ software.



**Supplementary Table 1.** The fractional abundance of  $^{13}\text{C}_{16}$ -labeled triglycerides in different samples.

| M+16    | BSA-whole cells |          |          | OA-whole cells |          |          | OA-LDs   |          |          |
|---------|-----------------|----------|----------|----------------|----------|----------|----------|----------|----------|
|         | TAG48:2         | 0.163405 | 0.140884 | 0.185191       | 0.236564 | 0.24418  | 0.24481  | 0.179437 | 0.175597 |
| TAG48:1 | 0.133255        | 0.108331 | 0.148846 | 0.162038       | 0.16666  | 0.181186 | 0.223402 | 0.219806 | 0.236626 |
| TAG50:4 | 0.270872        | 0.272719 | 0.295094 | 0.159974       | 0.174798 | 0.165927 | 0.087491 | 0.091527 | 0.172058 |
| TAG50:3 | 0.217719        | 0.20615  | 0.231091 | 0.254389       | 0.25386  | 0.251559 | 0.14854  | 0.146998 | 0.245513 |
| TAG50:2 | 0.213248        | 0.196108 | 0.213866 | 0.275503       | 0.278028 | 0.281241 | 0.207748 | 0.207184 | 0.278488 |
| TAG50:1 | 0.173794        | 0.152298 | 0.177299 | 0.210769       | 0.21647  | 0.219362 | 0.251337 | 0.241416 | 0.251099 |
| TAG52:5 | 0.304058        | 0.273027 | 0.319822 | 0.200709       | 0.193125 | 0.187368 | 0.080159 | 0.082367 | 0.169051 |
| TAG52:4 | 0.196854        | 0.194903 | 0.213205 | 0.265444       | 0.271142 | 0.255509 | 0.112302 | 0.109937 | 0.214767 |
| TAG52:3 | 0.260636        | 0.257817 | 0.268264 | 0.333745       | 0.333669 | 0.318588 | 0.142007 | 0.142768 | 0.260656 |
| TAG52:2 | 0.276268        | 0.265487 | 0.260854 | 0.348132       | 0.362746 | 0.338519 | 0.189363 | 0.187206 | 0.289902 |
| TAG52:1 | 0.229631        | 0.209673 | 0.221455 | 0.272057       | 0.271254 | 0.265788 | 0.248434 | 0.247549 | 0.282431 |
| TAG54:5 | 0.177626        | 0.151246 | 0.184732 | 0.069116       | 0.069776 | 0.070739 | 0.035273 | 0.033478 | 0.066342 |
| TAG54:4 | 0.356134        | 0.356609 | 0.345143 | 0.100932       | 0.10288  | 0.101387 | 0.045831 | 0.04631  | 0.100994 |
| TAG54:3 | 0.230521        | 0.226928 | 0.258715 | 0.175291       | 0.174768 | 0.174862 | 0.083825 | 0.080754 | 0.168302 |
| TAG54:2 | 0.253488        | 0.251025 | 0.236269 | 0.275982       | 0.279534 | 0.276803 | 0.158218 | 0.164177 | 0.258844 |
| TAG54:1 | 0.214008        | 0.203386 | 0.206958 | 0.261238       | 0.26528  | 0.263942 | 0.229373 | 0.227609 | 0.280147 |
| TAG56:3 | 0.211615        | 0.21252  | 0.241579 | 0.180619       | 0.176942 | 0.177904 | 0.100975 | 0.099145 | 0.185721 |
| TAG56:2 | 0.227159        | 0.223742 | 0.234967 | 0.262233       | 0.264163 | 0.258539 | 0.17035  | 0.162028 | 0.243013 |
| TAG58:3 | 0.212519        | 0.215991 | 0.241857 | 0.194496       | 0.199587 | 0.207026 | 0.118243 | 0.116621 | 0.206348 |

| M+16    | OE NC-whole cells |          |          | OE DGAT1-whole cells |          |          | OE DGAT1-LDs |          |          |
|---------|-------------------|----------|----------|----------------------|----------|----------|--------------|----------|----------|
|         | TAG48:2           | 0.138486 | 0.144759 | 0.184901             | 0.298536 | 0.291484 | 0.302097     | 0.222096 | 0.220194 |
| TAG48:1 | 0.123746          | 0.111851 | 0.112117 | 0.243293             | 0.245156 | 0.246452 | 0.209667     | 0.200324 | 0.210549 |
| TAG50:4 | 0.134483          | 0        | 0        | 0.200369             | 0.198914 | 0.194727 | 0.107559     | 0.106975 | 0.114875 |
| TAG50:3 | 0.153641          | 0.171981 | 0.195577 | 0.281578             | 0.285318 | 0.282087 | 0.203154     | 0.211518 | 0.198209 |
| TAG50:2 | 0.199014          | 0.184033 | 0.206456 | 0.278445             | 0.290024 | 0.282052 | 0.249752     | 0.252344 | 0.248286 |
| TAG50:1 | 0.134318          | 0.122303 | 0.133834 | 0.236725             | 0.255959 | 0.242436 | 0.237025     | 0.23584  | 0.236763 |
| TAG52:5 | 0.189553          | 0.191486 | 0.220712 | 0.265073             | 0.276498 | 0.279581 | 0.120602     | 0.126175 | 0.114227 |
| TAG52:4 | 0.380094          | 0.428654 | 0.465981 | 0.351299             | 0.34037  | 0.353721 | 0.19108      | 0.199025 | 0.179858 |
| TAG52:3 | 0.213316          | 0.210598 | 0.224125 | 0.371344             | 0.367622 | 0.374638 | 0.229666     | 0.238397 | 0.220708 |
| TAG52:2 | 0.259173          | 0.248051 | 0.2749   | 0.37532              | 0.367614 | 0.37349  | 0.266382     | 0.271643 | 0.255172 |
| TAG52:1 | 0.184758          | 0.18057  | 0.193859 | 0.284097             | 0.300889 | 0.303599 | 0.252855     | 0.252812 | 0.247736 |
| TAG54:5 | 0.120927          | 0.117768 | 0.119701 | 0.11774              | 0.112481 | 0.118788 | 0.041573     | 0.040936 | 0.04206  |
| TAG54:4 | 0.321198          | 0.33856  | 0.403657 | 0.117128             | 0.120552 | 0.121685 | 0.045396     | 0.046482 | 0.046409 |
| TAG54:3 | 0.225172          | 0.226271 | 0.249056 | 0.182219             | 0.18004  | 0.189655 | 0.091172     | 0.096595 | 0.095902 |
| TAG54:2 | 0.198173          | 0.194974 | 0.205162 | 0.27487              | 0.280729 | 0.277564 | 0.195336     | 0.201938 | 0.19718  |
| TAG54:1 | 0.194106          | 0.186483 | 0.188276 | 0.280938             | 0.292415 | 0.292787 | 0.260179     | 0.267272 | 0.259276 |
| TAG56:3 | 0.167581          | 0.165164 | 0.182104 | 0.161829             | 0.171837 | 0.166324 | 0.107924     | 0.115875 | 0.111249 |
| TAG56:2 | 0.176795          | 0.168922 | 0.180764 | 0.250141             | 0.271678 | 0.269895 | 0.195404     | 0.196843 | 0.19842  |
| TAG58:3 | 0.185304          | 0.176038 | 0.195985 | 0.201705             | 0.20717  | 0.209003 | 0.132993     | 0.139649 | 0.13531  |

| M+16    | DMSO-whole cells |          |          | Atglistatin-whole cells |          |          | Atglistatin-LDs |          |          |
|---------|------------------|----------|----------|-------------------------|----------|----------|-----------------|----------|----------|
|         | TAG48:2          | 0.197089 | 0.193064 | 0.160215                | 0.296072 | 0.292791 | 0.299318        | 0.236047 | 0.224751 |
| TAG48:1 | 0.154902         | 0.147066 | 0.134205 | 0.255376                | 0.251816 | 0.251585 | 0.216987        | 0.214282 | 0.202605 |
| TAG50:4 | 0                | 0        | 0        | 0.192255                | 0.180752 | 0.171468 | 0.123915        | 0.10971  | 0.098899 |
| TAG50:3 | 0.227229         | 0.222466 | 0.193693 | 0.282001                | 0.275743 | 0.284665 | 0.216281        | 0.218003 | 0.194154 |
| TAG50:2 | 0.235501         | 0.230555 | 0.208364 | 0.301196                | 0.29491  | 0.279496 | 0.264472        | 0.261821 | 0.240169 |
| TAG50:1 | 0.162371         | 0.160719 | 0.147772 | 0.262689                | 0.258462 | 0.242786 | 0.239448        | 0.237188 | 0.224183 |
| TAG52:5 | 0.234946         | 0.229021 | 0.21989  | 0.283645                | 0.261169 | 0.272281 | 0.143126        | 0.144788 | 0.103563 |
| TAG52:4 | 0.46233          | 0.472976 | 0.446192 | 0.34755                 | 0.344522 | 0.352414 | 0.207763        | 0.203884 | 0.171035 |
| TAG52:3 | 0.248689         | 0.239179 | 0.242079 | 0.369047                | 0.365399 | 0.376065 | 0.247882        | 0.240322 | 0.21029  |
| TAG52:2 | 0.272732         | 0.268579 | 0.254489 | 0.364588                | 0.366028 | 0.373423 | 0.284912        | 0.27944  | 0.248394 |
| TAG52:1 | 0.207343         | 0.22238  | 0.197393 | 0.305763                | 0.302722 | 0.2922   | 0.271473        | 0.247543 | 0.235008 |
| TAG54:5 | 0.131931         | 0.125915 | 0.128887 | 0.124181                | 0.117741 | 0.117824 | 0.044915        | 0.050619 | 0.039263 |
| TAG54:4 | 0.346216         | 0.352868 | 0.347214 | 0.132762                | 0.128967 | 0.117736 | 0.04798         | 0.053834 | 0.041929 |
| TAG54:3 | 0.232809         | 0.250992 | 0.231703 | 0.201591                | 0.190322 | 0.178359 | 0.102208        | 0.10268  | 0.087108 |
| TAG54:2 | 0.218337         | 0.211062 | 0.206882 | 0.286419                | 0.277941 | 0.280508 | 0.208202        | 0.202375 | 0.184275 |
| TAG54:1 | 0.205171         | 0.215112 | 0.204543 | 0.301148                | 0.29399  | 0.291344 | 0.274463        | 0.26705  | 0.255507 |
| TAG56:3 | 0.171666         | 0.173814 | 0.177557 | 0.177584                | 0.170012 | 0.165306 | 0.1123          | 0.11685  | 0.098649 |
| TAG56:2 | 0.188946         | 0.18981  | 0.179838 | 0.268964                | 0.260068 | 0.253688 | 0.197951        | 0.209111 | 0.188429 |
| TAG58:3 | 0.181075         | 0.17317  | 0.180067 | 0.212989                | 0.210598 | 0.20622  | 0.142611        | 0.153851 | 0.120386 |

**Supplementary Table 2.** Palmitoylated cilia-related proteins identified by IP-ABE in HUVECs.

| <b>Symbol</b> | <b>Entrez Gene Name</b>                                                                                 |
|---------------|---------------------------------------------------------------------------------------------------------|
| ARL13B        | ADP ribosylation factor like GTPase 13B                                                                 |
| EHD1          | EH domain-containing protein 1                                                                          |
| ARF4          | ADP-ribosylation factor 4                                                                               |
| SEPTIN2       | Septin-2                                                                                                |
| EHD2          | EH domain-containing protein 2                                                                          |
| HDAC6         | Histone deacetylase 6                                                                                   |
| SEPTIN7       | Septin-7                                                                                                |
| DYNLL1        | Dynein light chain 1                                                                                    |
| BBS7          | Bardet-Biedl syndrome 7                                                                                 |
| NECTIN2       | Nectin-2                                                                                                |
| FLNA          | Filamin-A                                                                                               |
| AURKA         | Aurora kinase A                                                                                         |
| MAP4          | Microtubule-associated protein 4                                                                        |
| RP2           | Protein XRP2                                                                                            |
| ATXN10        | Ataxin-10                                                                                               |
| RAB8A         | Ras-related protein Rab-8A                                                                              |
| SLC9A3R1      | Na (+) / H (+) exchange regulatory cofactor NHE-RF; Na (+) / H (+) exchange regulatory cofactor NHE-RF1 |
| GSN           | Gelsolin                                                                                                |
| KIF3A         | Kinesin-like protein KIF3A                                                                              |
| WDR54         | WD repeat-containing protein 54                                                                         |
| ACTR3         | Actin-related protein 3                                                                                 |
| PTPN23        | Tyrosine-protein phosphatase non-receptor type 23                                                       |
| CEP131        | Centrosomal protein of 131 kDa                                                                          |
| DNMBP         | Dynamin-binding protein                                                                                 |
| DCTN1         | Dynactin subunit 1                                                                                      |
| RO60          | 60 kDa SS-A/Ro ribonucleoprotein                                                                        |
| HSPB11        | Intraflagellar transport protein 25 homolog                                                             |
| CFAP20        | Cilia- and flagella-associated protein 20                                                               |
| MAPRE1        | Microtubule-associated protein RP/EB family member 1                                                    |
| ACTR2         | Actin-related protein 2                                                                                 |
| GBF1          | Golgi-specific brefeldin A-resistance guanine nucleotide exchange factor 1                              |
| PCM1          | Pericentriolar material 1 protein                                                                       |
| DNAAF5        | Dynein assembly factor 5                                                                                |

**Supplementary Table 3.** Compositions of diets used in this study.

|                               |                        | <b>CD</b> |      | <b>HFD-S</b> |      | <b>HFD-S &amp; P</b> |      | <b>HFD-P</b> |      |
|-------------------------------|------------------------|-----------|------|--------------|------|----------------------|------|--------------|------|
|                               |                        | gm        | kcal | gm           | kcal | gm                   | kcal | gm           | kcal |
| <b>Protein</b>                | Casein                 | 200       | 800  | 200          | 800  | 200                  | 800  | 200          | 800  |
|                               | L-Cystine              | 3         | 12   | 3            | 12   | 3                    | 12   | 3            | 12   |
| <b>Carbohydrate</b>           | Corn Starch            | 375       | 1500 | 0            | 0    | 0                    | 0    | 0            | 0    |
|                               | Maltodextrin           | 125       | 500  | 125          | 500  | 125                  | 500  | 125          | 500  |
|                               | Sucrose                | 200       | 800  | 68.75        | 275  | 68.75                | 275  | 68.75        | 275  |
| <b>Fat</b>                    | cocoa butter           | 20        | 180  | 20           | 180  | 20                   | 180  | 20           | 180  |
|                               | Soybean Oil            | 25        | 225  | 250          | 2250 | 115                  | 1035 | 25           | 225  |
|                               | Palm Oil               | 0         | 0    | 0            | 0    | 135                  | 1215 | 225          | 2025 |
| <b>Fatty acid composition</b> | C16:0                  | 7.96      | -    | 31.59        | -    | 76.14                | -    | 105.84       | -    |
|                               | C16:1                  | 0.04      | -    | 0.04         | -    | 0.44                 | -    | 0.71         | -    |
|                               | C18:0                  | 8.24      | -    | 18.14        | -    | 13.27                | -    | 17.91        | -    |
|                               | C18:1                  | 17.86     | -    | 119.56       | -    | 107.95               | -    | 100.21       | -    |
|                               | SFA                    | 16.64     | -    | 51.74        | -    | 97.23                | -    | 127.56       | -    |
|                               | MUFA                   | 12.3      | -    | 63.6         | -    | 82.77                | -    | 95.55        | -    |
|                               | PUFA                   | 14.98     | -    | 144.81       | -    | 78.91                | -    | 35.91        | -    |
| <b>Vitamins and Minerals</b>  | cellulose              | 50        | 0    | 50           | 0    | 50                   | 0    | 50           | 0    |
|                               | Mineral Mix,<br>S10021 | 10        | 0    | 10           | 0    | 10                   | 0    | 10           | 0    |
|                               | Calcium<br>Phosphate   | 13        | 0    | 13           | 0    | 13                   | 0    | 13           | 0    |
|                               | Calcium<br>Carbonate   | 5.5       | 0    | 5.5          | 0    | 5.5                  | 0    | 5.5          | 0    |
|                               | Potassium<br>Citrate   | 16.5      | 0    | 16.5         | 0    | 16.5                 | 0    | 16.5         | 0    |
|                               | Vitamin Mix,<br>v10001 | 10        | 40   | 10           | 40   | 10                   | 40   | 10           | 40   |
|                               | Choline<br>Bitartrate  | 2         | 0    | 2            | 0    | 2                    | 0    | 2            | 0    |
|                               | cholesterol            | 5.3       | 0    | 5.3          | 0    | 5.3                  | 0    | 5.3          | 0    |
|                               | <b>Summary</b>         |           | gm%  | kcal%        | gm%  | kcal%                | gm%  | kcal%        | gm%  |
| Protein                       |                        | 19        | 20   | 26           | 20   | 26                   | 20   | 26           | 20   |
| Carbohydrate                  |                        | 67        | 70   | 26           | 20   | 26                   | 20   | 26           | 20   |
|                               | Fat                    | 4         | 10   | 35           | 60   | 35                   | 60   | 35           | 60   |

**Supplementary Table 4.** Primers used for qRT-PCR.

| <b>Gene Name</b> | <b>Primer Sequence 5'-3'</b>                                       |
|------------------|--------------------------------------------------------------------|
| <i>ZDHHC2</i>    | Forward: TCCCGGTGGTGTTCATCAC<br>Reverse: CAACTTGTTTCGCCAGTGTTTTTC  |
| <i>ZDHHC3</i>    | Forward: CCACTTCCGAAACATTGAGCG<br>Reverse: CCACAGCCGTCACGGATAAA    |
| <i>ZDHHC4</i>    | Forward: CCTGACTTGTGGAACCAATCC<br>Reverse: GCACCTCACGTTCTTTGGAAAC  |
| <i>ZDHHC5</i>    | Forward: GTTTGGCTTTGGCCTCCTTTA<br>Reverse: ACACACATTACTGCCATTGTGAC |
| <i>ZDHHC6</i>    | Forward: GTTGTGGTATTGGCCCTTACA<br>Reverse: AAAGCCCGGACCGACAAAC     |
| <i>ZDHHC7</i>    | Forward: CTGACCGGGTCTGGTTCATC<br>Reverse: CATGACGAAAGTCACCACGAA    |
| <i>ZDHHC8</i>    | Forward: CTCAAACCCGCCAAGTACATC<br>Reverse: ACACAGCTCGTGTCAACCAC    |
| <i>ZDHHC9</i>    | Forward: CCTGGGTGGGGAATTGTGTT<br>Reverse: ACGACGGACCAGAGTGTAAG     |
| <i>ZDHHC12</i>   | Forward: GTGCTGACCTGGGGAATCAC<br>Reverse: CTGCACATTCACGTAGCCA      |
| <i>ZDHHC13</i>   | Forward: AGGAAGCCATTAAGGTCACTCC<br>Reverse: GCCAAAACCTATGCACCGTC   |
| <i>ZDHHC14</i>   | Forward: TGTGATAACTGCGTAGAACGGT<br>Reverse: CGTGGGTGATAACGAATGCAA  |
| <i>ZDHHC16</i>   | Forward: CGAAAGGCACATCAACAAGAAG<br>Reverse: AGTTGTCCAAGCAGCCGTAG   |
| <i>ZDHHC17</i>   | Forward: GGCCCGGATGAGTACGATAC<br>Reverse: TCCAAGAGGTTACCATATCCA    |
| <i>ZDHHC18</i>   | Forward: CACCCCGAACCTCACACTG<br>Reverse: TGAAGGCCGTCAGGAATGAGA     |
| <i>ZDHHC20</i>   | Forward: TTCGTGGTCGTCTGGTCCTA<br>Reverse: AGGTAAACAACGGTCTTTCCATT  |
| <i>ZDHHC21</i>   | Forward: TGTTGTTGACCCACATGGTTG<br>Reverse: GAGGCCCTACTAAGGCAA      |
| <i>ZDHHC22</i>   | Forward: GGGGCGCTCTTCCTATTCC<br>Reverse: GCAGAAGTGGGTGCTAGGTG      |
| <i>ZDHHC24</i>   | Forward: CTGGCACAGTTTGCCTTGG<br>Reverse: CAGGGACCCAGGTCATAGGAG     |

|                      |                                                                    |
|----------------------|--------------------------------------------------------------------|
| <i>ABHD17A</i>       | Forward: GGTACACGGTCCTCTTCTCG<br>Reverse: CGTAGCCGGAGTAGTCGTAG     |
| <i>ABHD17B</i>       | Forward: TCTTGGTCAAATGAGCAGCTTT<br>Reverse: GCGAATGCCATATCTTGTCTT  |
| <i>ABHD17C</i>       | Forward: GGTTTGCGTGTGGCTTTTCC<br>Reverse: CATGAATGACCAACACAGGAGA   |
| <i>APT1</i>          | Forward: CCTTTGCAGGTATCAGAAGTTCA<br>Reverse: GCTGCCTGTTTAATCCCAGAT |
| <i>APT2</i>          | Forward: AGGCAGCTAATGGCAGTGC<br>Reverse: AGGTGTGACAACAGACCGGA      |
| <i>SCD1</i>          | Forward: TTCTTGCGATACTCTGGTGC<br>Reverse: CGGGATTGAATGTTCTTGTCTG   |
| <i>IL1B</i>          | Forward: GCAACTGTTCTGA ACTCAACT<br>Reverse: ATCTTTTGGGGTCCGTCAACT  |
| <i>IL6</i>           | Forward: TAGTCCTTCTACCCCAATTTCC<br>Reverse: TTGGTCCTTAGCCACTCCTTC  |
| <i>Tgfb1</i>         | Forward: CTCCCGTGGCTTCTAGTGC<br>Reverse: GCCTTAGTTTGGACAGGATCTG    |
| <i>Vcam1</i>         | Forward: AGTTGGGGATTTCGGTTGTTCT<br>Reverse: CCCCTCATTCTTACCACCC    |
| <i>Sele</i>          | Forward: ATGCCTCGCGCTTTCTCTC<br>Reverse: GTAGTCCCGCTGACAGTATGC     |
| <i>Tnfaip3</i>       | Forward: GAACAGCGATCAGGCCAGG<br>Reverse: GGACAGTTGGGTGTCTCACATT    |
| <i>Hmox1</i>         | Forward: AAGCCGAGAATGCTGAGTTCA<br>Reverse: GCCGTGTAGATATGGTACAAGGA |
| <i>iNOS</i>          | Forward: AGGGACAAGCCTACCCCTC<br>Reverse: CTCATCTCCCGTCAGTTGGT      |
| <i>GAPDH (human)</i> | Forward: AGGTCGGTGTGAACGGATTTG<br>Reverse: TGTAGACCATGTAGTTGAGGTCA |
| <i>GAPDH (mouse)</i> | Forward: AGGTCGGTGTGAACGGATTTG<br>Reverse: TGTAGACCATGTAGTTGAGGTCA |

---

## Uncropped Immunoblots of Supplementary Figures

**Supplementary Figure 6d:**

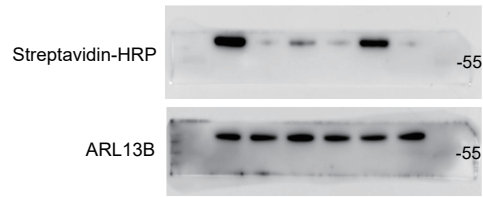

**Supplementary Figure 6f:**

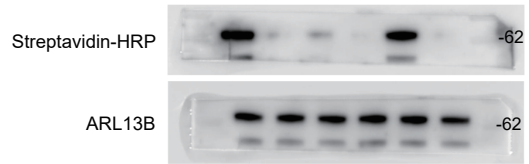

**Supplementary Figure 6h:**

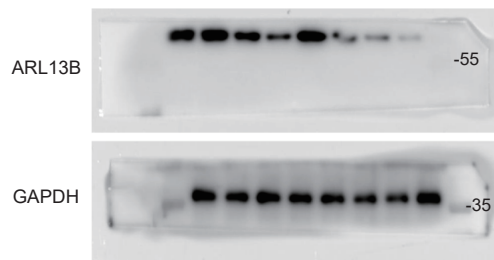

**Supplementary Figure 7a:**

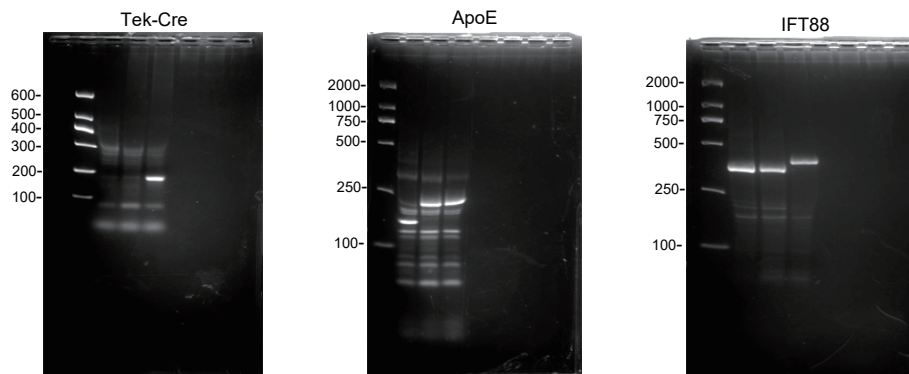

**Supplementary Figure 7b:**

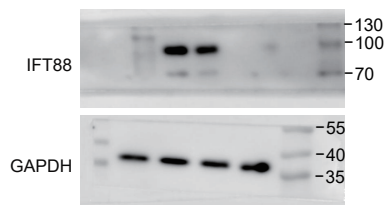

**Supplementary Figure 7j:**

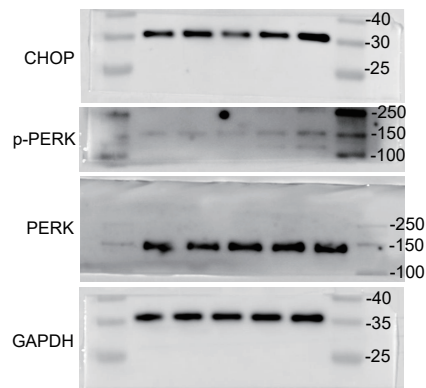

**Supplementary Figure 7i:**

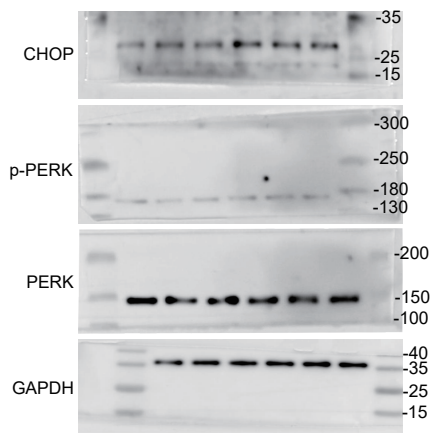

**Supplementary Figure 7n:**

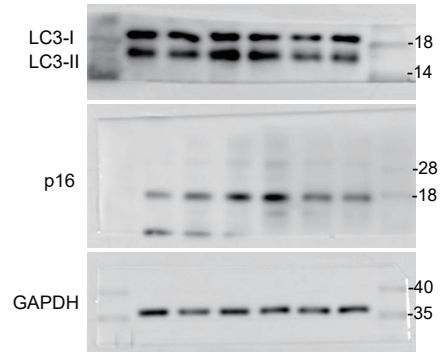

Supplement: 41467_2024_52621_MOESM1_ESM.pdf [file 41467_2024_52621_MOESM1_ESM.pdf]
